# Supplementary material
Source: PubMed Central journal article supplement (PMC6645315)
Supplement: ao8b01537_si_003.pdf [file ao8b01537_si_003.pdf]

**Mechanical stability of lipid membranes decorated with Dextran Sulfate**

Candelaria I. Cámara<sup>1,2</sup>, Florencia E. Lurgo<sup>1,2</sup>, Maria Laura Fanani<sup>1,2</sup>, Natalia Wilke<sup>1,2\*</sup>

<sup>1</sup> Universidad Nacional de Córdoba. Facultad de Ciencias Químicas. Departamento de Química Biológica Ranwel Caputto. Ciudad Universitaria, X5000HUA, Córdoba, Argentina

<sup>2</sup> CONICET. Universidad Nacional de Córdoba. Centro de Investigaciones en Química Biológica de Córdoba (CIQUIBIC), Ciudad Universitaria, X5000HUA, Córdoba, Argentina.

\* To whom correspondence should be addressed:

E-mail: wilke@mail.fcq.unc.edu.ar

Phone: +54-351-5353855.

**Index**

**SM1- Compression isotherms**

**SM2- BAM images**

**SM3- Size distribution of LUVs determined by DLS.**

**SM4- Rupture and permeability of LUVs upon detergent.**

**SM5- Determination of shear viscosity of the used solutions.**

**SM6- Determination of shape fluctuation of GUVs**

SM1- Compression isotherms

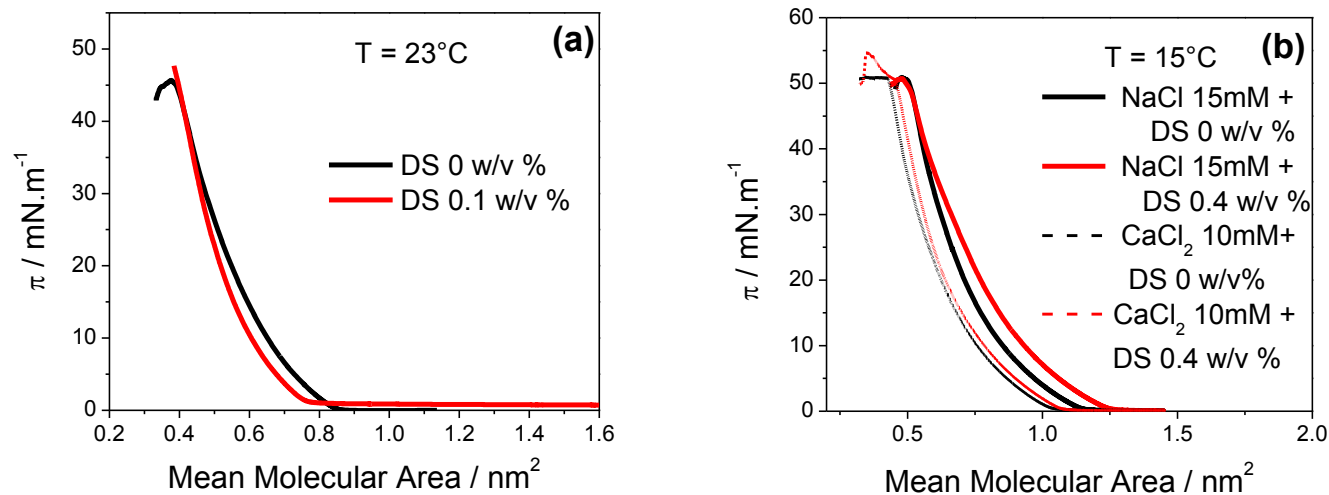

**Figure S1:** Surface pressure - average molecular area compression isotherms for **(a)** DOTAP: DOPC 1:9 and **(b)** DOPG: DPPC 1:1; in the absence and in the presence of **(a)** 0.1 w/v % and **(b)** 0.4 w/v % of DS. Experimental conditions: **(a)** 145 mM NaCl and **(b)** 15 mM NaCl or 10mM CaCl<sub>2</sub>. The surface-pressure vs mean molecular areas were similar (within errors) in the absence and in the presence of DS (typical errors: 0.03  $\text{nm}^2$  at low and 0.01  $\text{nm}^2$  at high surface pressures).

**SM2- BAM images**

**Table S1:** Surface pressure at which domains appear in the BAM images.

| <b>Surface pressure of appearance of domains (mN/m)</b>       |                                   |                          |                                              |                                   |
|---------------------------------------------------------------|-----------------------------------|--------------------------|----------------------------------------------|-----------------------------------|
| <b>Condition</b>                                              | <b>DOPG/DPPC 1:1<br/>T = 15°C</b> | <b>DPPC<br/>T = 24°C</b> | <b>Condition</b>                             | <b>DOPG/DPPC 1:1<br/>T = 15°C</b> |
| <b>NaCl 145mM</b>                                             | 24 ± 2                            | 8±1                      | <b>NaCl 15mM</b>                             | 24±1                              |
| <b>NaCl 145mM +<br/>DS 0.1 w/v %</b>                          | 19 ± 2                            | 8±1                      | <b>NaCl 15mM + DS 0.4 w/v %</b>              | 15±1                              |
| <b>NaCl 145mM +<br/>CaCl<sub>2</sub> 10 mM</b>                | 17 ± 2                            | 6±1                      | <b>CaCl<sub>2</sub> 10 mM</b>                | 15.1±1                            |
| <b>NaCl 145mM + CaCl<sub>2</sub> 10<br/>mM + DS 0.1 w/v %</b> | 12 ± 2                            | 4±1                      | <b>CaCl<sub>2</sub> 10 mM + DS 0.4 w/v %</b> | 5.5±0.5                           |

DOTAP/DOPC 1:9

NaCl 145 mM

NaCl 145 mM, DS 0.1 w/v %

30 mN.m<sup>-1</sup>

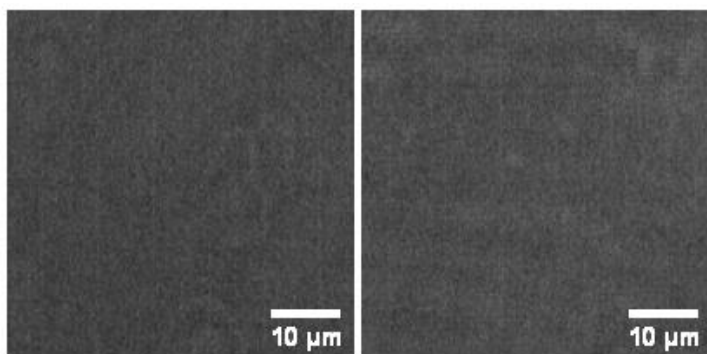

**Figure S2:** Representative BAM images of monolayers composed of DOTAP:DOPC 1:9, in the absence and in the presence of 0.1% w/v of DS at the indicated surface pressures. The gray levels were rescaled from the original 0–255 range to 0–73 for better visualization. Despite images look similar, the determined gray level values were  $20.2 \pm 0.5$  (without DS) and  $23.6 \pm 0.2$  (with DS).

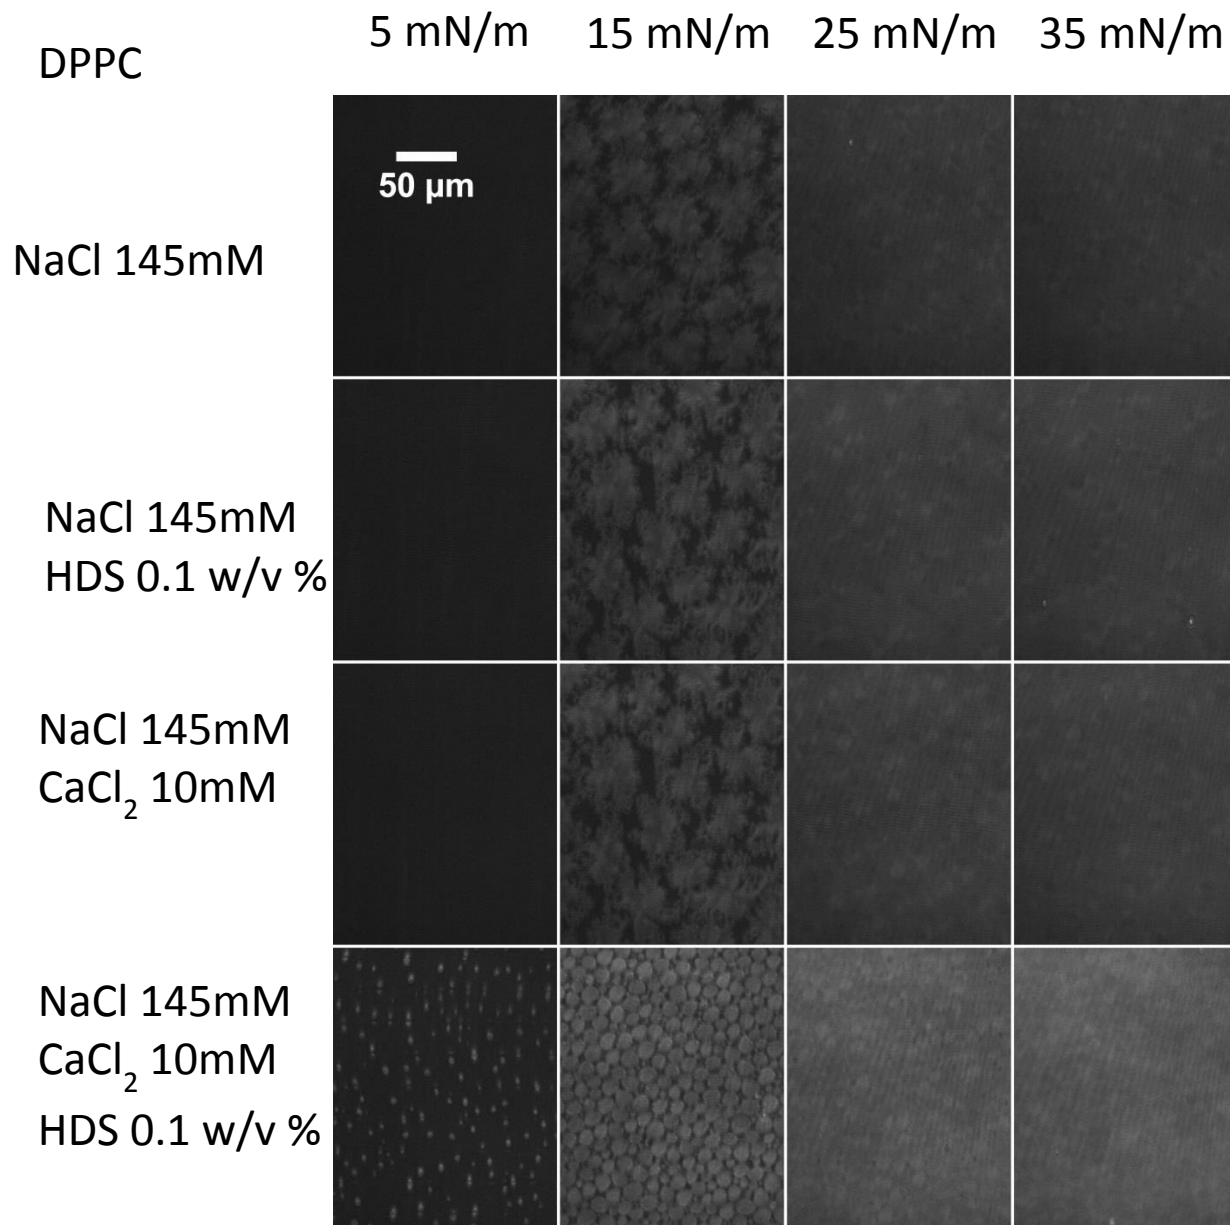

**Figure S3:** Representative BAM images of monolayers composed of DPPC in the absence and in the presence of 0.1 w/v % of DS at the indicated surface pressures. The gray levels were rescaled from the original 0–255 range to 9–52 for better visualization. The brighter regions correspond to the condensed phase.

~ S6 ~

5 mN/m    15 mN/m    25 mN/m    35 mN/m

DOPG/DPPC 1:1

NaCl 145mM

NaCl 145mM

HDS 0.1 w/v %

NaCl 145mM

CaCl<sub>2</sub> 10mM

NaCl 145mM

CaCl<sub>2</sub> 10mM

HDS 0.1 w/v %

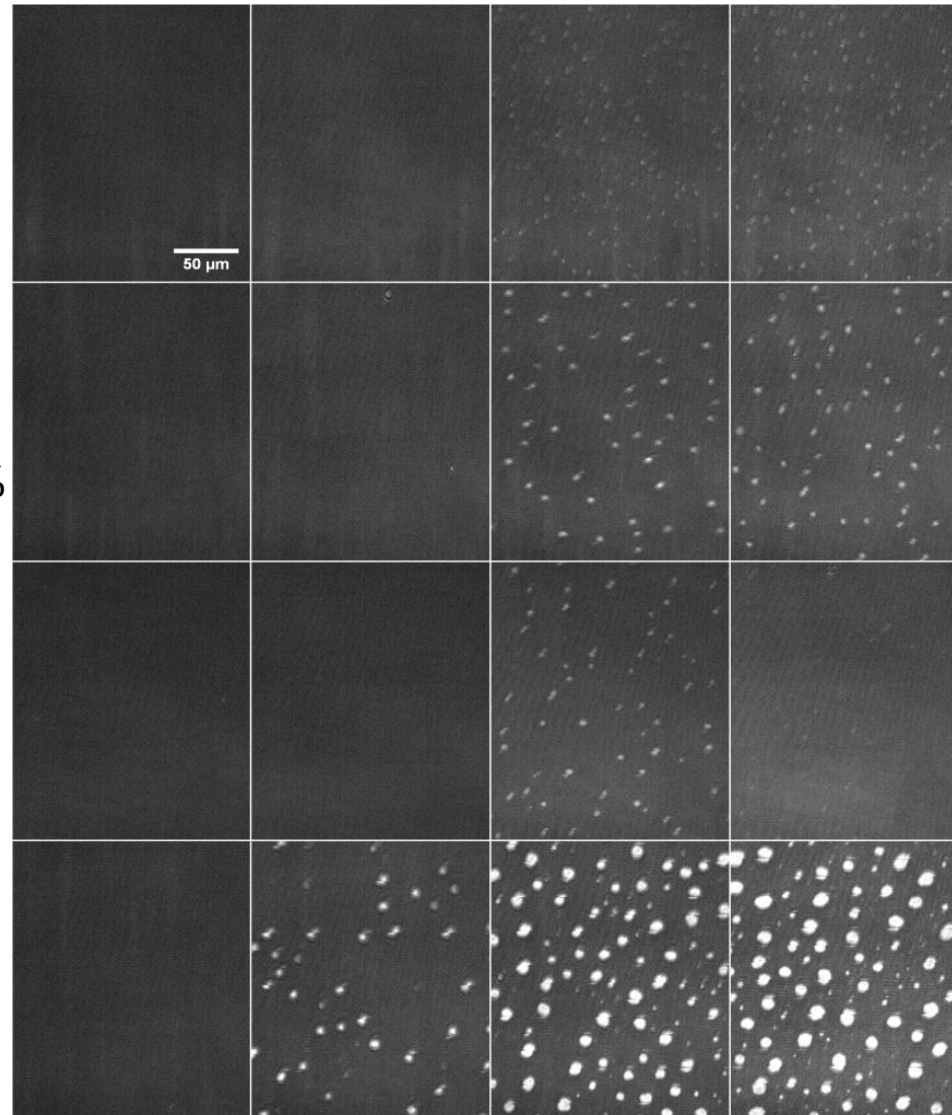

**Figure S4:** Representative BAM images of monolayers composed of DOPG:DPPC 1:1 in the absence and in the presence of 0.1 w/v % of DS at the indicated surface pressures. The gray levels were rescaled from the original 0–255 range to 9–52 for better visualization. The brighter regions correspond to the condensed phase.

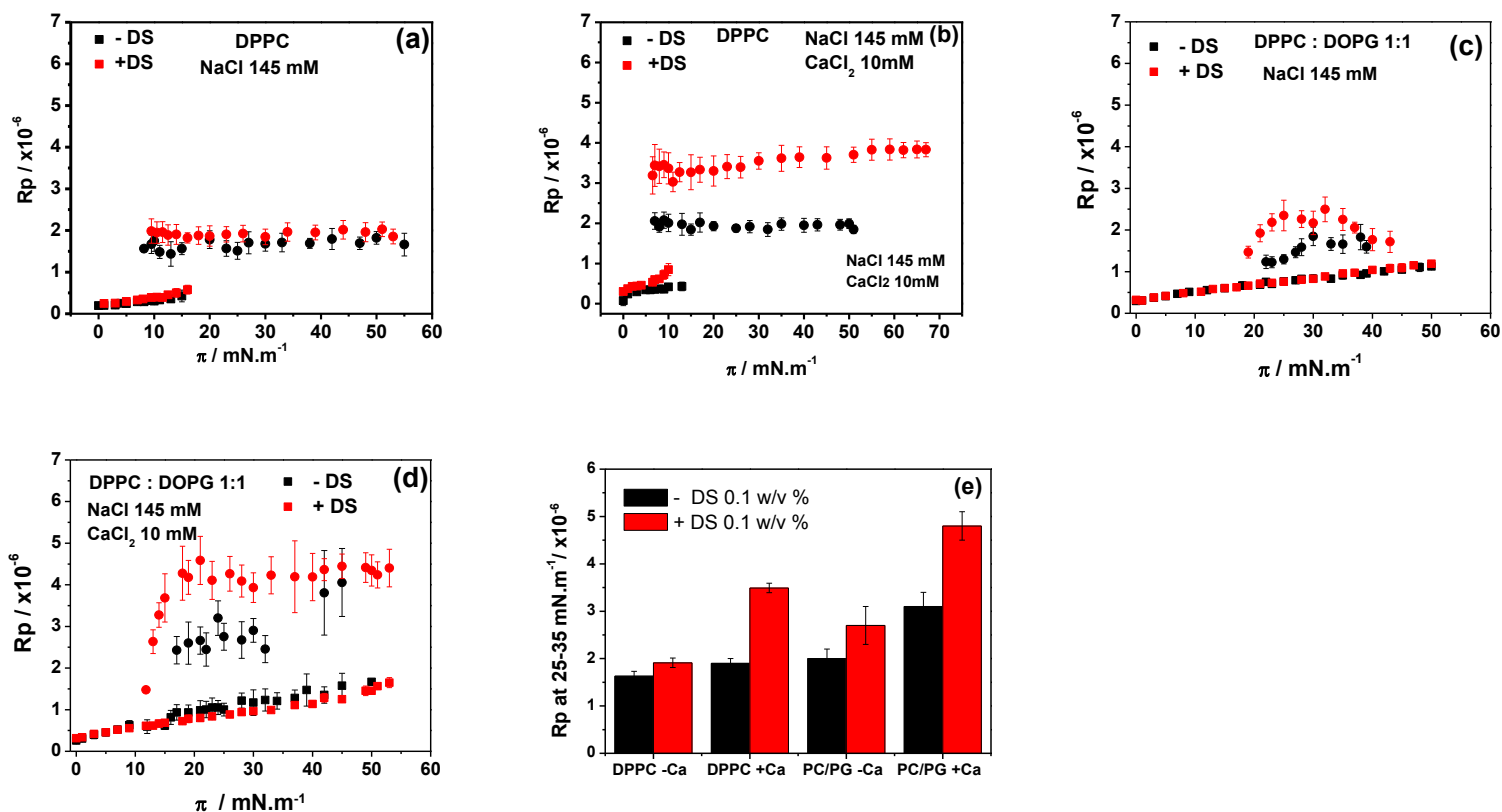

**Figure S5:** Average reflected light intensity of BAM images as those shown in figure S3 and S4 as a function of surface pressure for (a-b) DPPC and (c-d) DOPG:DPPC 1:1 monolayer in the absence (**black**) and in the presence of 0.1 w/v % DS (**red**). Subphase composition: **(a)** 145 mM NaCl, **(b)** 145 mM NaCl + 10 mM CaCl<sub>2</sub>. The  $R_p$  values correspond to regions of the monolayer in the expanded phase ( $\blacksquare$ ) or in the condensed phase ( $\bullet$ ). Each data correspond to average  $\pm$  SD of 6 different regions in at least 4 images. **(e)** Mean value of  $R_p$  in the range of 25-35 mN.m<sup>-1</sup> for each monolayer condition in the absence (**black**) and in the presence (**red**) of 0.1 % w/v DS. The mean values of  $R_p$  were taken from the condensed phase.

SM3- Size distribution of LUVs determined by DLS.

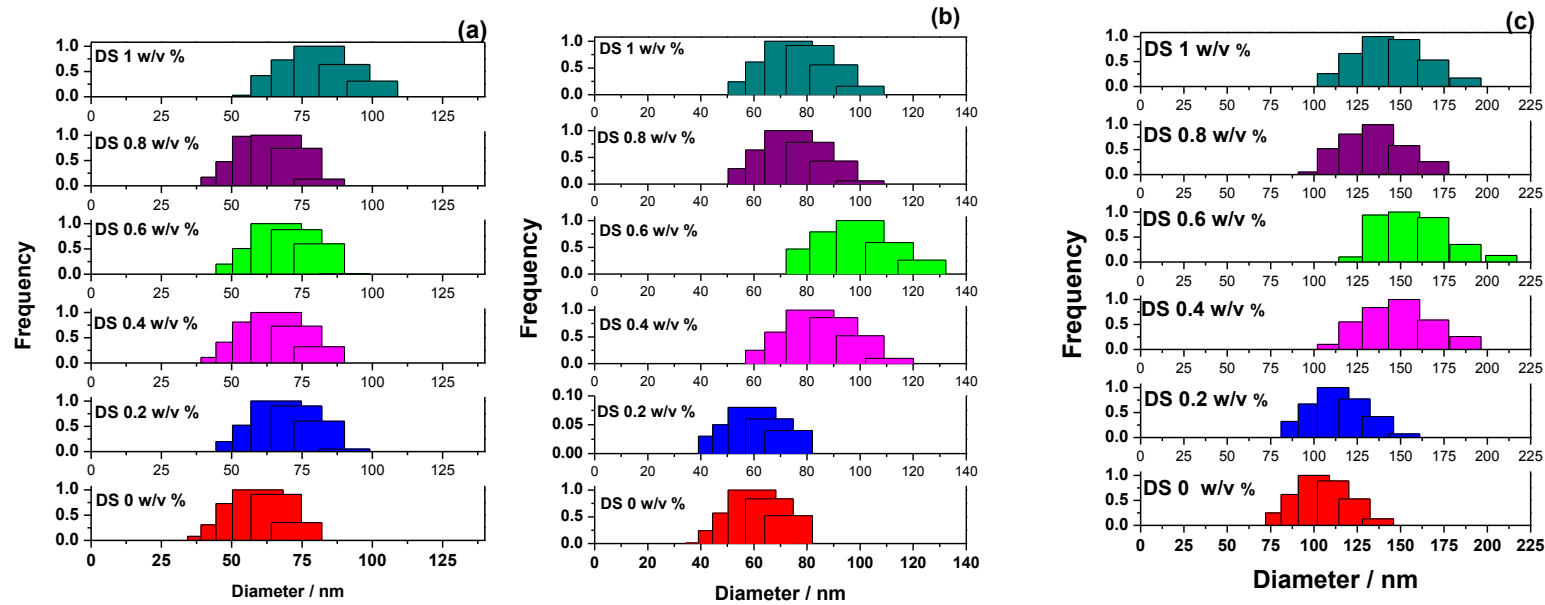

**Figure S6:** LUV's size distribution (Frequency (intensity) vs Diameter) for: DOPG/DPPC 1:1 in NaCl 15mM **(a)** or CaCl<sub>2</sub> 10mM **(b)**; DOTAP: DOPC 1:9 in NaCl 145 mM **(c)**. Increasing DS concentration from the bottom (0 w/v %) to the top (1 w/v %).



**SM4- Rupture and permeability of LUVs upon detergent addition.**

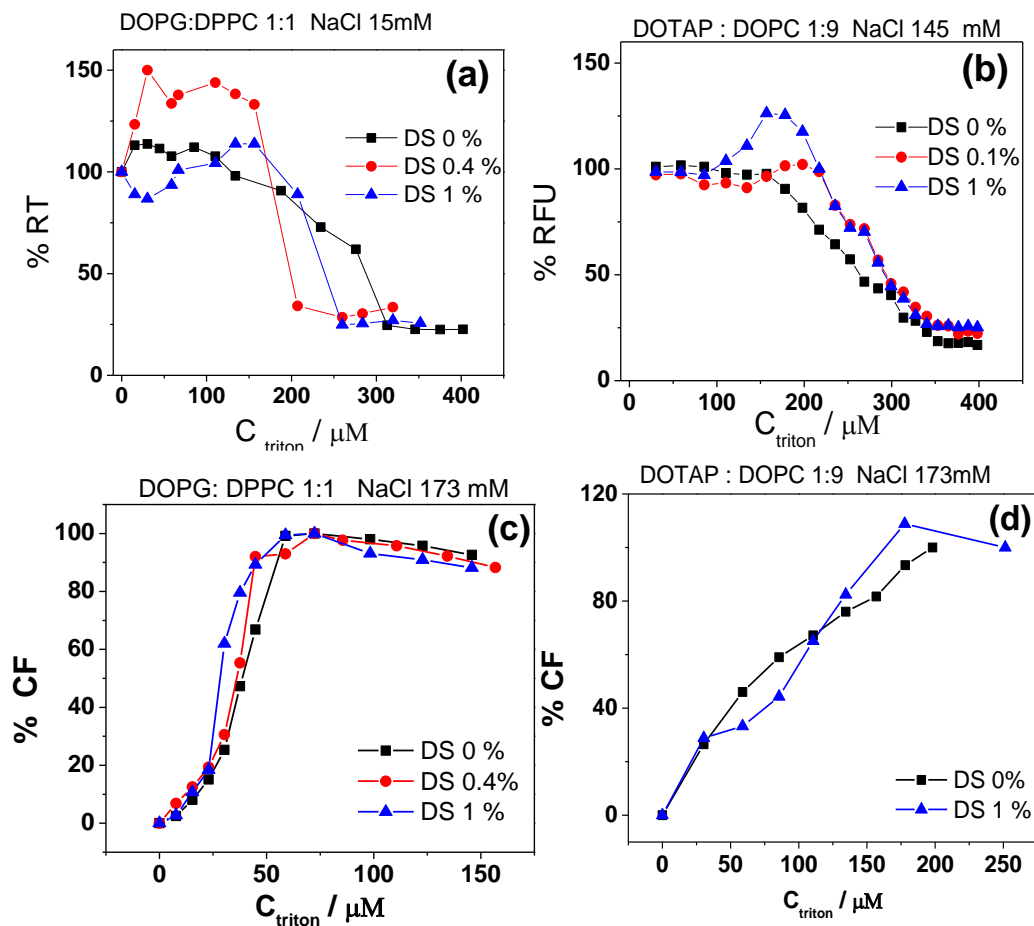

**Figure S7:** (a-b) Percent of relative turbidity (%RT) and (c-d) Percent of released carboxyfluorescein (% CF) vs triton concentration for LUVs composed of DOPG: DPPC 1:1 (a-c) and DOTAP:DOPC 1:9 (b-d). Subphase composition: 0, 0.4 and 1 w/v % of DS in NaCl 15 mM (a), 145 mM (b) and 173 mM (c-d).

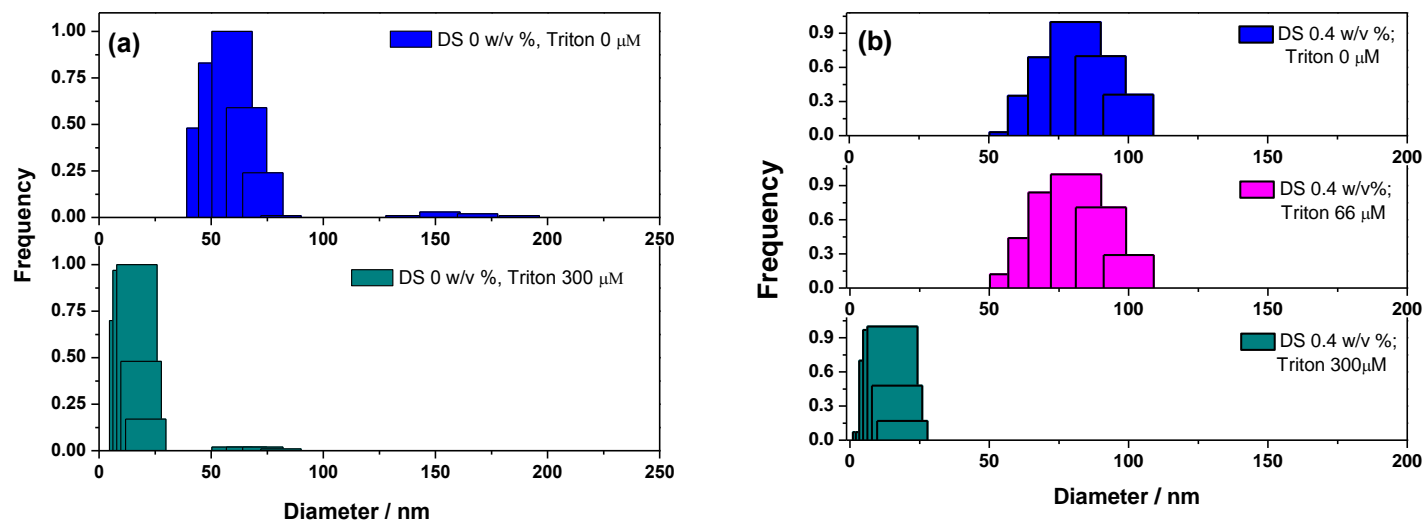

**Figure S8:** LUV's size distribution (Frequency (intensity) vs Diameter) for DOPG/DPPC 1:1 in absence **(a)** and presence of DS 0.4 w/v % **(b)** in NaCl 15mM; at 0  $\mu\text{M}$ , 66  $\mu\text{M}$  and 300  $\mu\text{M}$  Triton concentration.

**SM5- Determination of the shear viscosity of the used solutions.**

The rheological characterization of the solutions was carried out using a rotational Anton Paar Physica MCR 301 controlled strain rheometer. A 50 mm cone-plate (CP50) geometry with an angle of  $\alpha=1.006^\circ$  was used and the volumes employed were 0.7 mL. Shear stress ( $\tau$  / Pa) as a function of shear rate ( $\dot{\gamma}$  / Hz) was measured in a range of shear rate between 10-10000 Hz.

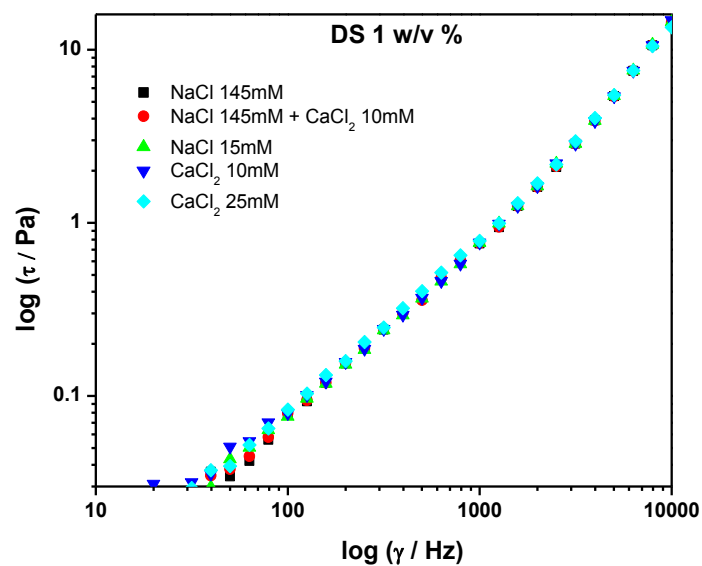

**Figure S9:** Double logarithm plot of shear stress vs shear rate for solutions containing DS 1 w/v % and NaCl 145 mM; NaCl 145 mM + CaCl<sub>2</sub> 10mM; NaCl 15 mM; CaCl<sub>2</sub> 10mM and CaCl<sub>2</sub> 25mM. T = 20°C

**Table S2:** Shear Viscosity values for DS 1 w/v % and the indicated salts at 20°C and 100 Hz. Shear viscosity was calculated as  $\tau$  (shear stress/Pa)/ $\dot{\gamma}$  (shear rate / Hz). The data shown are the average values ( $\pm$  standard deviation) of two independent experiments.

| <b>Condition</b>                                      | <b>Shear Viscosity /Pa . s</b>   |
|-------------------------------------------------------|----------------------------------|
| <b>NaCl 145mM without DS*</b>                         | $(7.7 \pm 0.1) \times 10^{-4}$   |
| <b>NaCl 145 mM + DS 1% w/v</b>                        | $(7.7 \pm 0.2) \times 10^{-4}$   |
| <b>NaCl 145mM + CaCl<sub>2</sub> 10mM + DS 1% w/v</b> | $(7.89 \pm 0.08) \times 10^{-4}$ |
| <b>NaCl 15Mm + DS 1% w/v</b>                          | $(7.4 \pm 0.2) \times 10^{-4}$   |
| <b>CaCl<sub>2</sub> 10mM + DS 1% w/v</b>              | $(7.6 \pm 0.9) \times 10^{-4}$   |
| <b>CaCl<sub>2</sub> 25mM + DS 1% w/v</b>              | $(7.80 \pm 0.08) \times 10^{-4}$ |

\* Control viscosity value for NaCl 145mM without DS.

SM6- Determination of the shape fluctuation of GUVs: Statistical analysis of GUV's shape

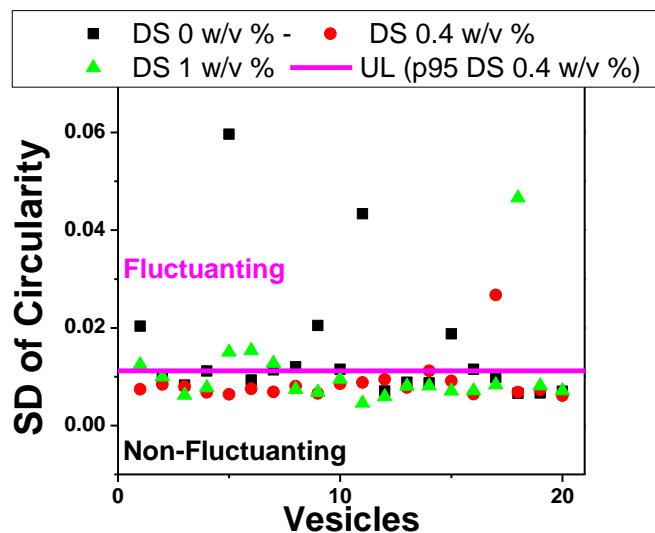

**Figure S10:** Standard deviation of the circularity for each individual GUV. Analyzed treatments: DS 0, 0.4 and 1 w/v % for DOPG : DPPC 1: 1 in CaCl<sub>2</sub> 10mM. The **magenta line** represent the upper limit used to define a GUV as “fluctuating” or “non-fluctuating”, i.e. the value of P95<sup>th</sup> for the data of the Standard deviation of the circularity of the less fluctuating population, which in this case corresponds to the treatment with DS 0.4 w/v % (see table S4).

**Table S3:** Average Circularity ( $\bar{C}$ ) with the corresponding standard deviation ( $SD\bar{C}$ ) for one of the experiment performed with DOPG:DPPC 1:1 in  $CaCl_2$  10 mM and with different DS concentration.

| GUV number | DS concentration / % w/v |                       |                       |                         |                     |                       |
|------------|--------------------------|-----------------------|-----------------------|-------------------------|---------------------|-----------------------|
|            | 0 w/v %                  |                       | 0.4 w/v %             |                         | 1.0 w/v %           |                       |
|            | $\bar{C}^{DS\ 0\%}$      | $SD\bar{C}^{DS\ 0\%}$ | $\bar{C}^{DS\ 0.4\%}$ | $SD\bar{C}^{DS\ 0.4\%}$ | $\bar{C}^{DS\ 1\%}$ | $SD\bar{C}^{DS\ 1\%}$ |
| 1          | 0.89886                  | 0.02036               | 0.8956                | 0.00744                 | 0.87818             | 0.01242               |
| 2          | 0.90164                  | 0.00963               | 0.90918               | 0.00841                 | 0.91804             | 0.00993               |
| 3          | 0.90738                  | 0.00829               | 0.90681               | 0.00795                 | 0.90957             | 0.00619               |
| 4          | 0.89023                  | 0.01116               | 0.91058               | 0.00681                 | 0.89882             | 0.00772               |
| 5          | 0.71645                  | 0.05963               | 0.91091               | 0.0064                  | 0.89624             | 0.01503               |
| 6          | 0.9161                   | 0.00932               | 0.91137               | 0.00752                 | 0.9147              | 0.01533               |
| 7          | 0.88967                  | 0.0114                | 0.90844               | 0.00688                 | 0.89999             | 0.01272               |
| 8          | 0.88989                  | 0.01202               | 0.91324               | 0.00807                 | 0.90411             | 0.00739               |
| 9          | 0.90245                  | 0.02049               | 0.9181                | 0.00658                 | 0.89879             | 0.00679               |
| 10         | 0.87234                  | 0.0115                | 0.91995               | 0.00857                 | 0.89635             | 0.00952               |
| 11         | 0.64584                  | 0.04333               | 0.90733               | 0.00883                 | 0.90306             | 0.00461               |
| 12         | 0.89313                  | 0.00708               | 0.91666               | 0.00943                 | 0.89927             | 0.0059                |
| 13         | 0.90675                  | 0.00884               | 0.91355               | 0.0078                  | 0.8948              | 0.00806               |
| 14         | 0.90179                  | 0.00872               | 0.90684               | 0.01121                 | 0.90005             | 0.00812               |
| 15         | 0.87218                  | 0.01875               | 0.91202               | 0.00914                 | 0.90475             | 0.00706               |
| 16         | 0.90895                  | 0.01151               | 0.90837               | 0.00642                 | 0.90146             | 0.00712               |
| 17         | 0.90013                  | 0.00979               | 0.80833               | 0.02674                 | 0.90257             | 0.00833               |
| 18         | 0.89636                  | 0.00663               | 0.9036                | 0.00685                 | 0.75533             | 0.04659               |
| 19         | 0.90407                  | 0.00665               | 0.90488               | 0.00732                 | 0.91725             | 0.00813               |
| 20         | 0.90062                  | 0.007                 | 0.90367               | 0.00612                 | 0.89698             | 0.0071                |

**Table S4:** Values of P95<sup>th</sup> for  $SD\bar{C}$  at different DS concentration for the experiments of table S1. Highlighted are the lower values of P95<sup>th</sup>, corresponding to a DS concentration of 0.4% w/v. This value was taken as the upper limit, and correspond to the magenta lines shown in figure SM6-1.

| DS (w/v %) | P95 <sup>th</sup> $SD\bar{C}$ |
|------------|-------------------------------|
| 0          | 0.0433                        |
| 0.4        | 0.0112                        |
| 1          | 0.0153                        |
